# Supplementary material
Source: PubMed Central journal article supplement (PMC5909993)
Supplement: DB170983SupplementaryData.pdf [file DB170983SupplementaryData.pdf]

## SUPPLEMENTARY DATA

### Perilipin 3 deficiency stimulates thermogenic beige adipocytes through PPAR $\alpha$ activation

Yun Kyung Lee, Jee Hyung Sohn, Ji Seul Han, Yoon Jeong Park, Yong Geun Jeon, Yul Ji, Knut Tomas Dalen, Carole Sztalryd, Alan R. Kimmel and Jae Bum Kim

**Supplementary Figure 1. Generation of the *Plin3* targeting vector and *Plin3* KO mice.** The *Plin3* floxed-Neo construct had three major locus modifications. A *loxP* site was introduced into intron 3; a KpnI<sup>+</sup>*FRT*-Neo-*FRT*-*LoxP*-SpeI cassette was introduced into intron 6, and a flanking thymidate kinase (*TK*) gene was added downstream of exon 8. The linearized *Plin3*-Fl-Neo vector was electroporated into 129/SvEv ES cells, and ES cell clones with the desired homologous recombination event were identified by PCR and Southern blot hybridization, using the indicated 5' (upstream-KpnI) and 3' (downstream-EcoRV) probes. Positive ES cells were micro-injected into blastocysts derived from C57BL/6J females and transferred into pseudo-pregnant C57BL/6J recipients. Chimeric mice were bred with C57BL/6J mice for germline transmission. The presence of the targeted allele in the agouti-colored offsprings was confirmed by PCR and Southern blot hybridization. These mice were mated with mice expressing Ella-Cre recombinase, and additionally crossed with C57BL/6J to obtain *Plin3* KO mice, which were confirmed for deletion of exons 3, 4, and 5 by Southern blot, PCR and RT-qPCR. The *Plin3* KO mice were backcrossed into C57BL/6J for more than 10 generations prior to experiments. **(A)** The levels of Plin3 proteins in various tissue by western blot analyses. GAPDH was used as a loading control. **(B)** *Plin3*-targeting vector and *Plin3* KO allele. Yellow boxes are non-coding exons and black boxes are coding exons. The Plin3 antibody recognition region is indicated. **(C)** RT-qPCR analysis for *Plin3* gene expression in BAT from WT and *Plin3* KO mice using primers located within the deletion target region (left). Each mRNA level was normalized to cyclophilin mRNA, and mRNA expression levels are relative to WT. Immunoblots for *Plin3* protein in BAT from WT and *Plin3* KO mice (right). GAPDH was used as a loading control. **(D)** Morphology of littermate WT and *Plin3* KO mice at 8 weeks of age. Data represent the mean  $\pm$  SEM.

SUPPLEMENTARY DATA

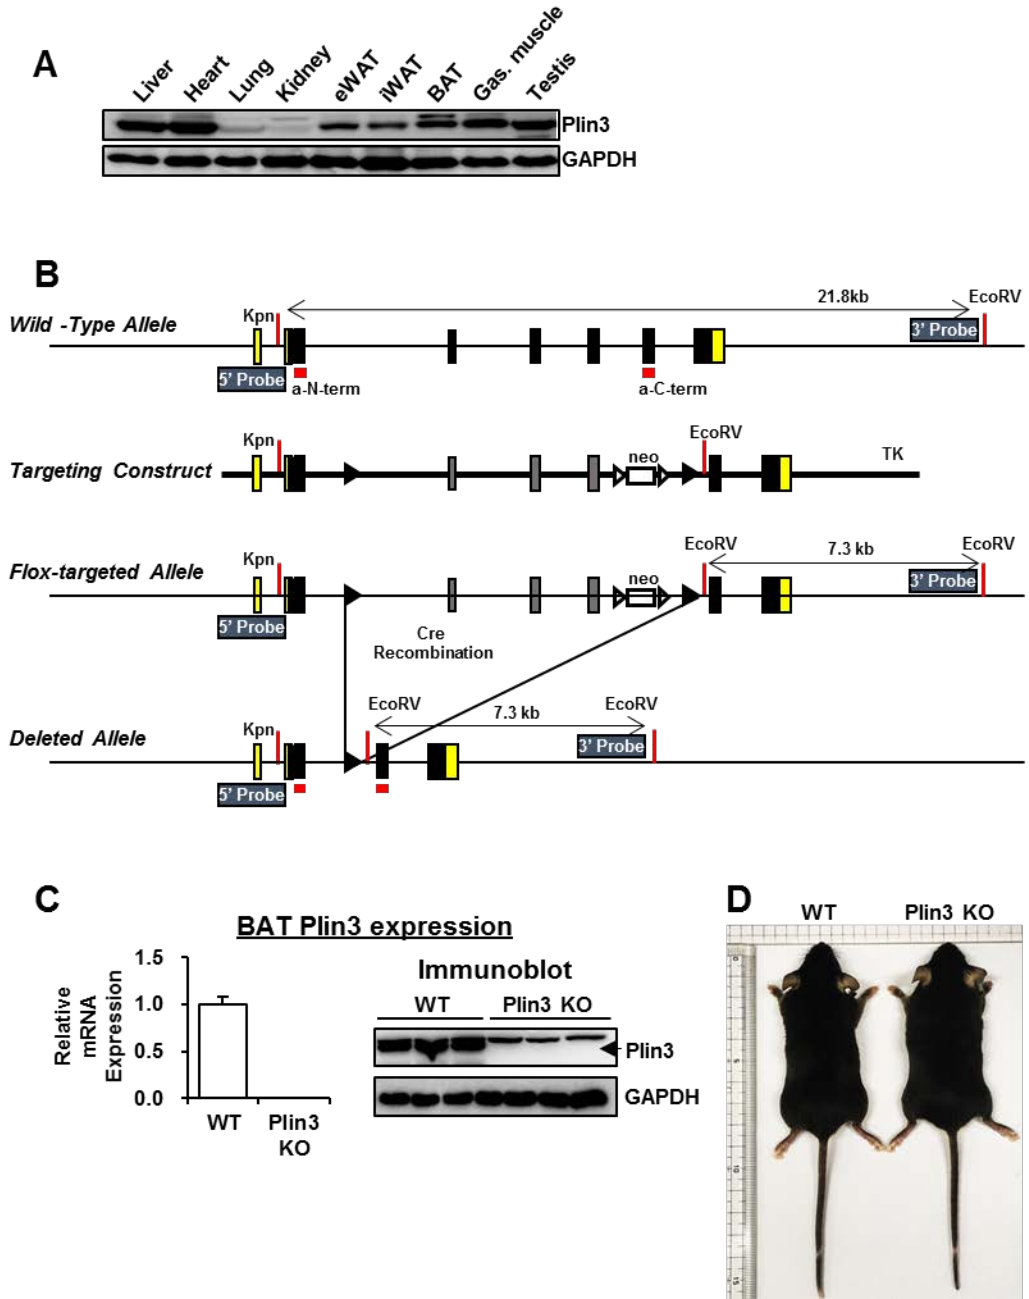

## SUPPLEMENTARY DATA

**Supplementary Figure 2. Metabolic phenotypes of *Plin3* KO mice.** (A) Body and tissue weights of WT and *Plin3* KO mice exposed to 30°C or 4°C for 6 days (n = 6 mice/group). (B) RT-qPCR analysis of beige adipocytes specific gene expression in iWAT from WT and *Plin3* KO mice exposed to 30°C or 4°C (n = 3 mice/group). Each mRNA level was normalized to cyclophilin mRNA, and mRNA expression levels are relative to WT at 30°C. For analysis of rectal temperature by administration of  $\beta$ 3-adrenergic receptor agonist CL-316,243, 10-week-old male mice were injected intraperitoneally with CL-316,243 at a dose of 0.5 mg/kg then measured body temperature using rectal probe. Whole-body oxygen consumption was measured using a TSE phenomaster. Briefly, mice were housed singly in TSE phenomaster cages and adapted for 48 h and injected intraperitoneally with a  $\beta$ 3-adrenergic receptor-specific agonist CL-316,243 at a dose of 0.5 mg/kg. Data on energy consumption rate ( $VO_2$ ,  $VCO_2$ , RER) were recorded every 7 min for a 1 h with temperature at 22°C. (C) Whole body rectal temperature for 30 min after CL-316,243 (0.5 mg/kg) under normal chow diet fed mice (n = 6 mice/group, 3 independent experiment). (D) Whole body energy consumption measured by TSE after CL-316,243 (0.5 mg/kg) injection under normal chow diet fed mice (n = 6 mice/group, 2 independent experiment). (E) RT-qPCR analysis of thermogenesis, fatty acid oxidation and mitochondrial related gene expression in iWAT from WT and *Plin3* KO mice (n = 3 mice/group). Each mRNA level was normalized to cyclophilin mRNA, and mRNA expression levels are relative to WT controls. (F) Whole body energy metabolic phenotypes were measured by TSE under normal chow diet fed mice (n = 6 mice/group, 2 independent experiment). Data represent the mean  $\pm$  SEM. \* $p$  < 0.05, \*\* $p$  < 0.01 indicate significant differences between groups as determined by either two-tailed unpaired Student's  $t$  tests or two-way ANOVA versus control.

SUPPLEMENTARY DATA

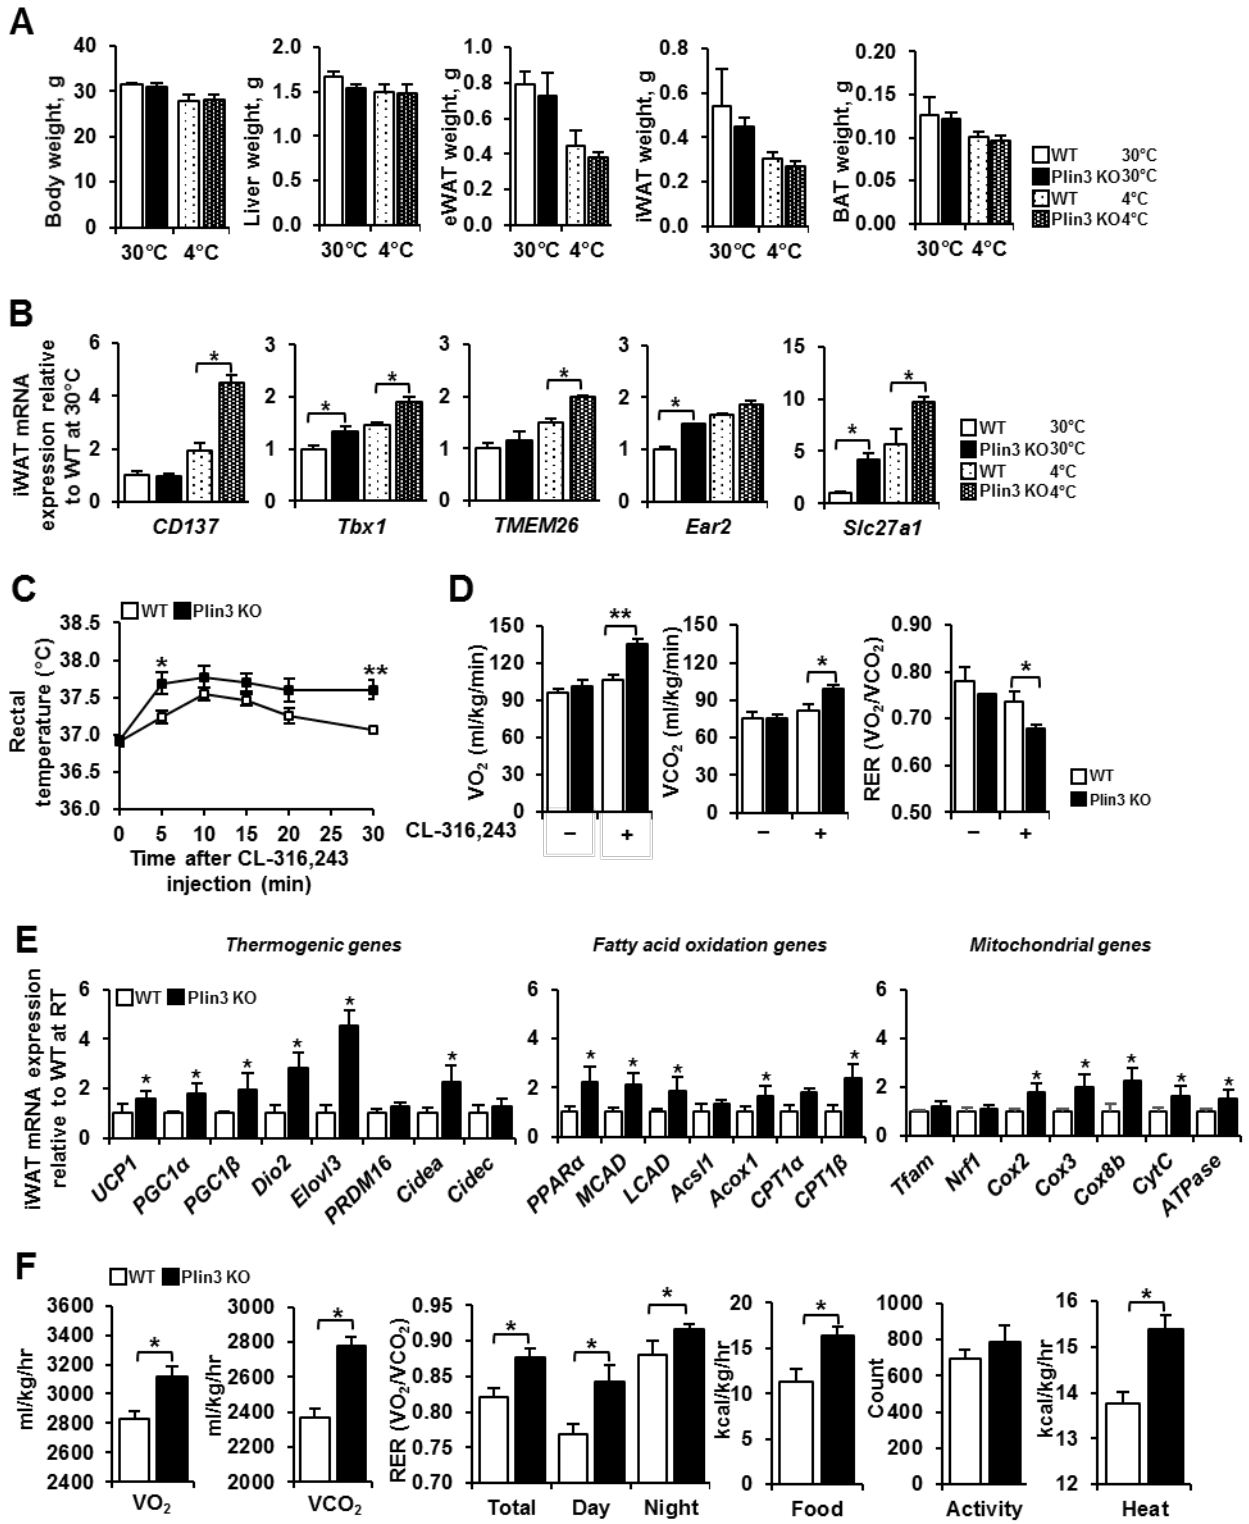

SUPPLEMENTARY DATA

**Supplementary Figure 3. Lipolysis in *Plin3* KO brown adipocytes.** Stromal vascular cells were isolated from BAT of WT and *Plin3* KO mice and were fully differentiated into adipocytes. For basal and stimulated lipolysis, differentiated adipocytes were treated with or without isoproterenol (1  $\mu$ M) for 3 h. The levels of glycerol were measured from conditional media. Data represent the mean  $\pm$  SEM.

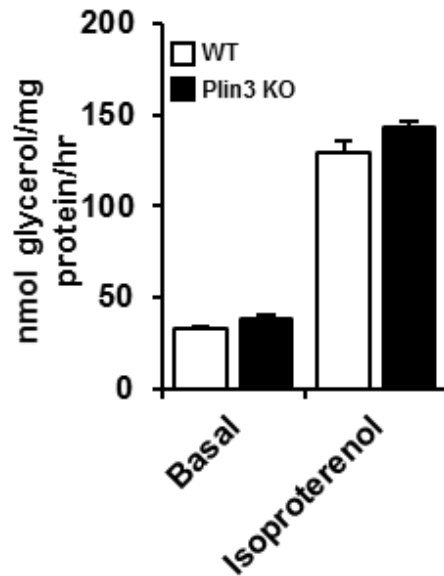

**Supplementary Figure 4. Lipolytic capacity in *Plin3*-deficient adipocytes.** (A) Western blot analysis of lipolytic activity in differentiated adipocytes from WT and *Plin3* KO mice. Differentiated adipocytes were treated with or without isoproterenol (3  $\mu$ M) for 6 h.  $\beta$ -actin was used as a loading control. (B) Immunoblots for lipolytic activity in isolated lipid droplet fraction from differentiated adipocytes of WT and *Plin3* KO mice. Differentiated adipocytes were treated with or without isoproterenol (3  $\mu$ M) for 6 h.

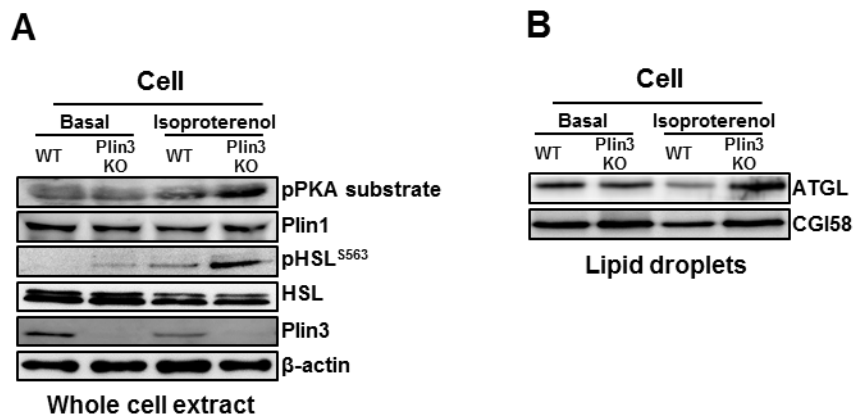

SUPPLEMENTARY DATA

**Supplementary Figure 5. Oxygen consumption rate in *Plin3* KO brown adipocytes and mitochondrial activity of *Plin3* KO adipocytes on cAMP/PKA.** (A) Oxygen consumption rates of differentiated adipocytes from BAT of WT or *Plin3* KO mice. Data represent the mean  $\pm$  SEM. (B) JC-1 using a mitochondrial membrane potential staining in differentiated adipocytes pretreated with or without H-89 (50  $\mu$ M) followed by forskolin (10  $\mu$ M) for 3 h. Bars represent 50  $\mu$ m.

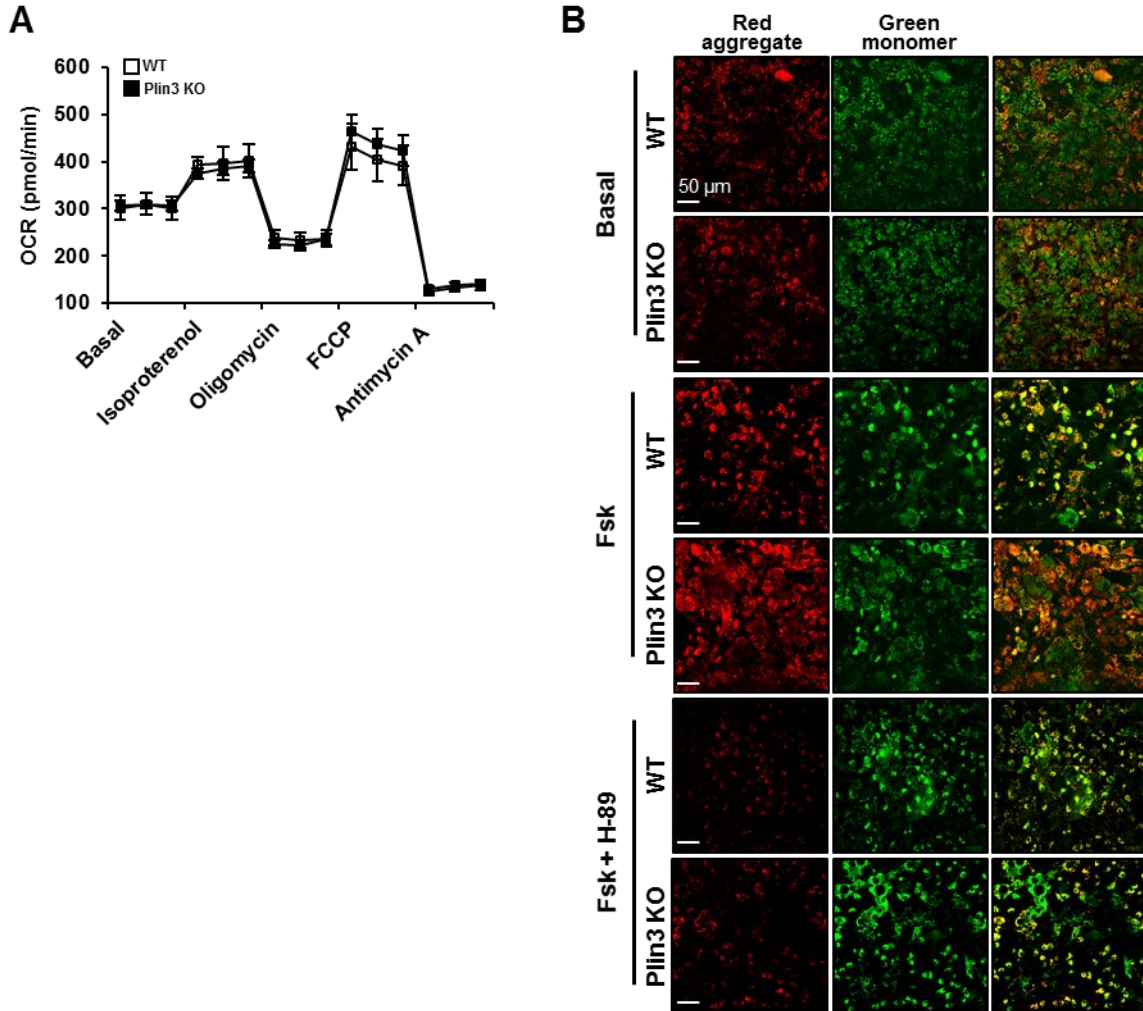

SUPPLEMENTARY DATA

**Supplementary Figure 6. PPAR $\alpha$  expression of *Plin3* KO adipocytes on cAMP/PKA.** RT-qPCR analysis of *PPAR $\alpha$*  and target genes in differentiated adipocytes pretreated with or without H-89 (50  $\mu$ M) followed by forskolin (10  $\mu$ M) for 3 h. Each mRNA level was normalized to cyclophilin mRNA, and mRNA expression levels are relative to untreated WT controls. Data represent the mean  $\pm$  SEM. \* $p$  < 0.05 indicates significant differences between *Plin3* KO + Fsk vs. WT with Fsk + H-89 and/or *Plin3* KO with Fsk + H-89 as determined by two-tailed unpaired Student's *t* tests.

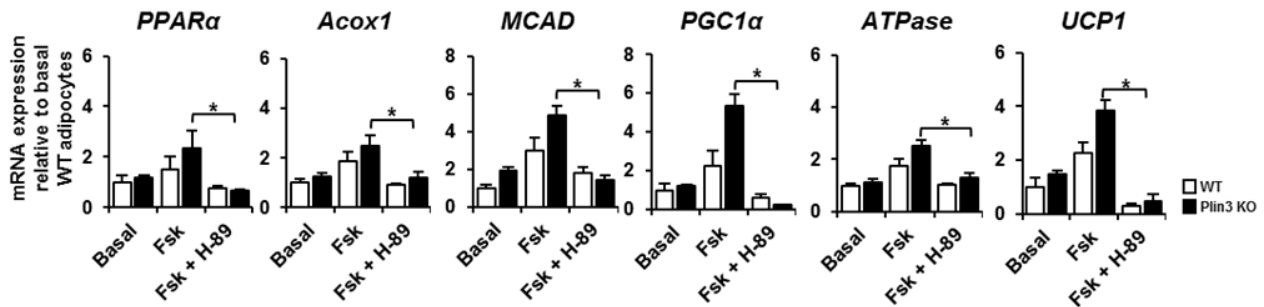

**Supplementary Figure 7. Effect of *Plin3* siRNA in differentiated WT adipocytes.** (A) RT-qPCR analysis of *Plin3* and *PPAR $\alpha$*  in differentiated adipocytes with or without *Plin3* siRNA. Differentiated adipocytes were treated with or without isoproterenol (3  $\mu$ M) for 8 h. Each mRNA level was normalized to cyclophilin mRNA, and mRNA expression levels are relative to untreated WT controls. (B) RT-qPCR analysis of thermogenic marker genes in differentiated adipocytes with or without *Plin3* siRNA in the presence or absence of isoproterenol (3  $\mu$ M) for 8 h. Each mRNA level was normalized to cyclophilin mRNA, and mRNA expression levels are relative to untreated WT controls. (C) Stromal vascular cells were isolated from iWAT of WT and *Plin3* KO mice and were fully differentiated into adipocytes. For basal and stimulated lipolysis, differentiated adipocytes were treated with or without isoproterenol (1  $\mu$ M) for 3 h. The levels of glycerol were measured from conditional media. (D) Oxygen consumption rates of differentiated adipocytes from iWAT of WT or *Plin3* KO mice. Differentiated adipocytes were treated with or without *Plin3* siRNA. Data represent the mean  $\pm$  SEM. \* $p$  < 0.05, \*\* $p$  < 0.01 indicate significant differences between groups as determined by either two-tailed unpaired Student's *t* tests or two-way ANOVA versus control.

SUPPLEMENTARY DATA

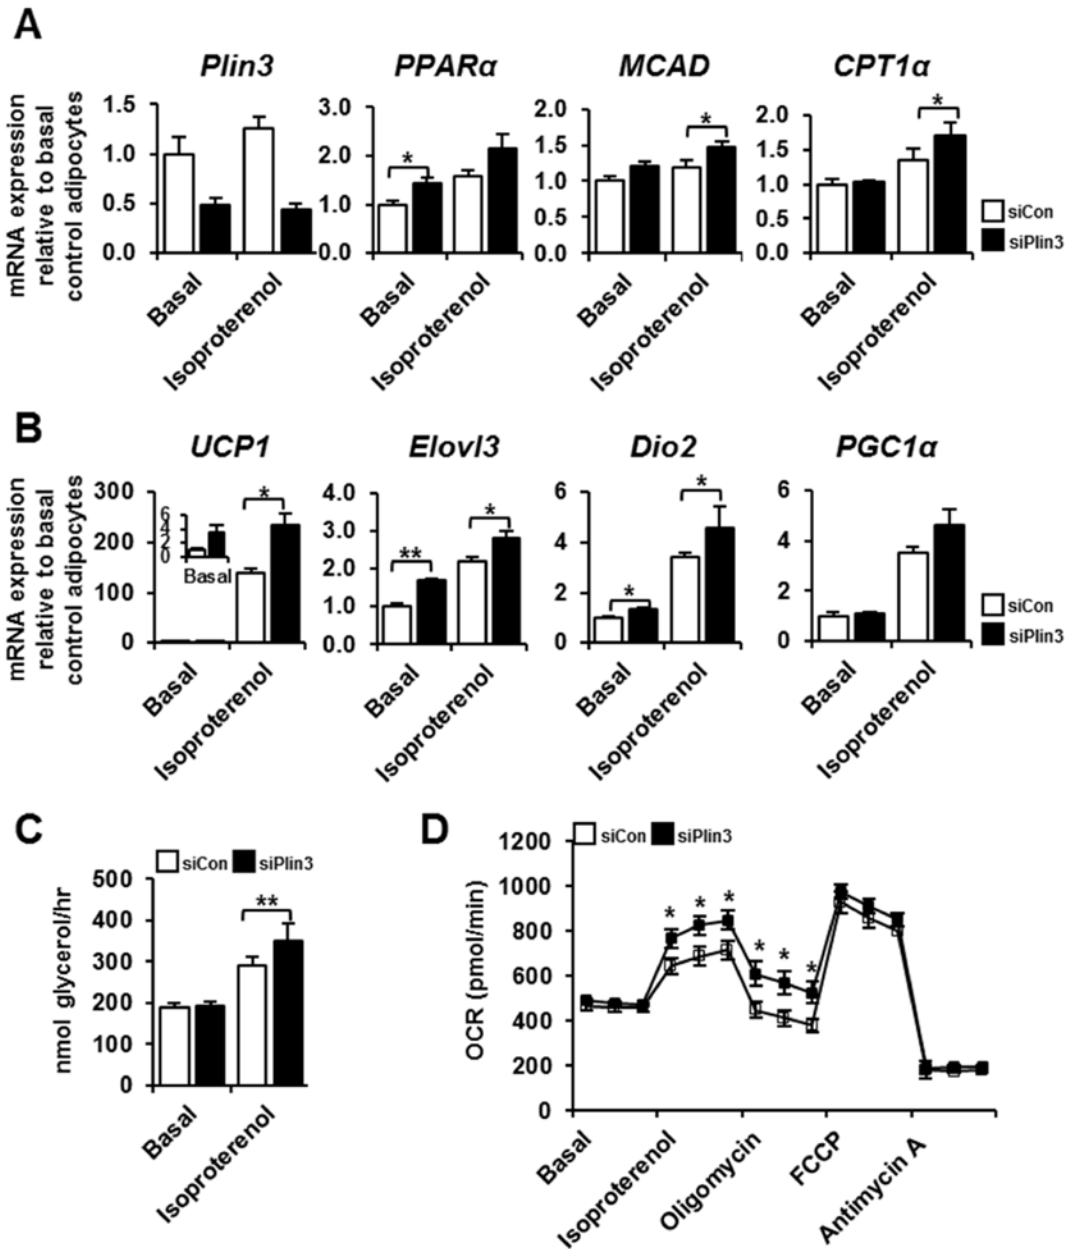



## SUPPLEMENTARY DATA

**Supplementary Figure 8. Overexpression of *Plin3* in differentiated adipocytes.** (A) eGFP (negative control) or GFP-*Plin3* were transfected in differentiated adipocytes from WT and *Plin3* KO mice for 8 h. Differentiated adipocytes were treated with or without isoproterenol (3  $\mu$ M) for 6 h. Each mRNA level was normalized to cyclophilin mRNA, and mRNA expression levels are relative to WT eGFP controls. (B) Western blot analysis of *Plin3* protein expression in differentiated adipocytes from WT and *Plin3* KO mice in the presence or absence of *Plin3*-GFP. Differentiated adipocytes were treated with or without isoproterenol (3  $\mu$ M) for 6 h.  $\beta$ -actin was used as a loading control. (C) RT-qPCR analysis of *PPAR $\alpha$*  and target genes in differentiated adipocytes treated with or without isoproterenol (3  $\mu$ M) for 6 h. Each mRNA level was normalized to cyclophilin mRNA, and mRNA expression levels are relative to WT eGFP controls. (D) RT-qPCR analysis of thermogenic genes in differentiated adipocytes treated with or without isoproterenol (3  $\mu$ M) for 6 h. Each mRNA level was normalized to cyclophilin mRNA, and mRNA expression levels are relative to WT eGFP controls. (E) Lipolysis assay in differentiated adipocytes from WT and *Plin3* KO mice in the presence or absence of *Plin3*-GFP. Differentiated adipocytes were treated with or without isoproterenol (3  $\mu$ M) for 6 h. The levels of glycerol were measured from conditional media. (F) Oxygen consumption rates of differentiated adipocytes from iWAT of WT or *Plin3* KO mice. Differentiated adipocytes were treated with or without *Plin3*-GFP. Data represent the mean  $\pm$  SEM. \* $p$  < 0.05, \*\* $p$  < 0.01 indicate significant differences between groups as determined by either two-tailed unpaired Student's  $t$  tests or two-way ANOVA versus control. # $p$  < 0.05, ## $p$  < 0.01 indicate significant differences between *Plin3* KO + Iso. (eGFP) vs. *Plin3* KO + *Plin3*-GFP as determined by two-tailed unpaired Student's  $t$  tests.

SUPPLEMENTARY DATA

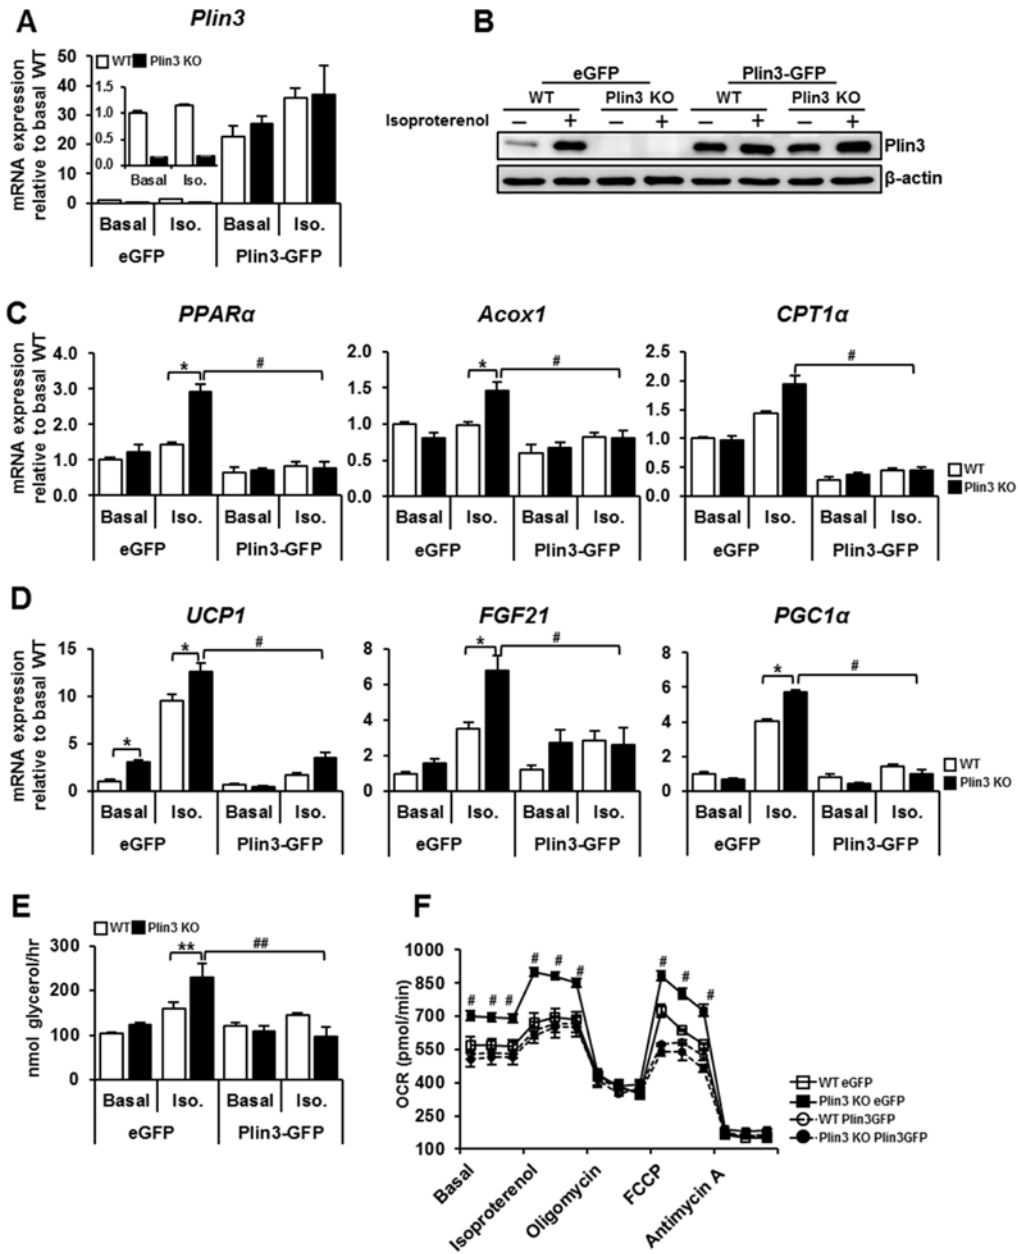

SUPPLEMENTARY DATA

**Supplementary Figure 9. Neutral lipid accumulation and PPAR $\gamma$  activation in *Plin3* KO iWAT.**

(A) Oil Red O staining of differentiated adipocytes from WT and *Plin3* KO mice (n = 6 mice/group, 3 independent experiments). Magnification was 100x with microscopy. (B) RT-qPCR analysis of TAG synthesis gene expression in differentiated adipocytes from WT and *Plin3* KO mice. Each mRNA level was normalized to cyclophilin mRNA, and mRNA expression levels are relative to WT. (C) RT-qPCR analysis of *PPAR $\gamma$*  and its target genes in iWAT from WT and *Plin3* KO mice exposed to 30°C or 4°C for 6 days (n = 3 mice/group). Each mRNA level was normalized to cyclophilin mRNA, and mRNA expression levels are relative to WT at 30°C. (D) RT-qPCR analysis of *PPAR $\gamma$*  and thermogenic marker genes in differentiated adipocytes treated with or without *PPAR $\gamma$*  siRNA. Differentiated adipocytes were treated with or without isoproterenol (3  $\mu$ M) for 8 h. Each mRNA level was normalized to cyclophilin mRNA, and mRNA expression levels are relative to untreated WT controls. Data represent the mean  $\pm$  SEM. \**p* < 0.05 indicates significant differences between groups as determined by two-tailed unpaired Student's *t* tests in comparison to control.

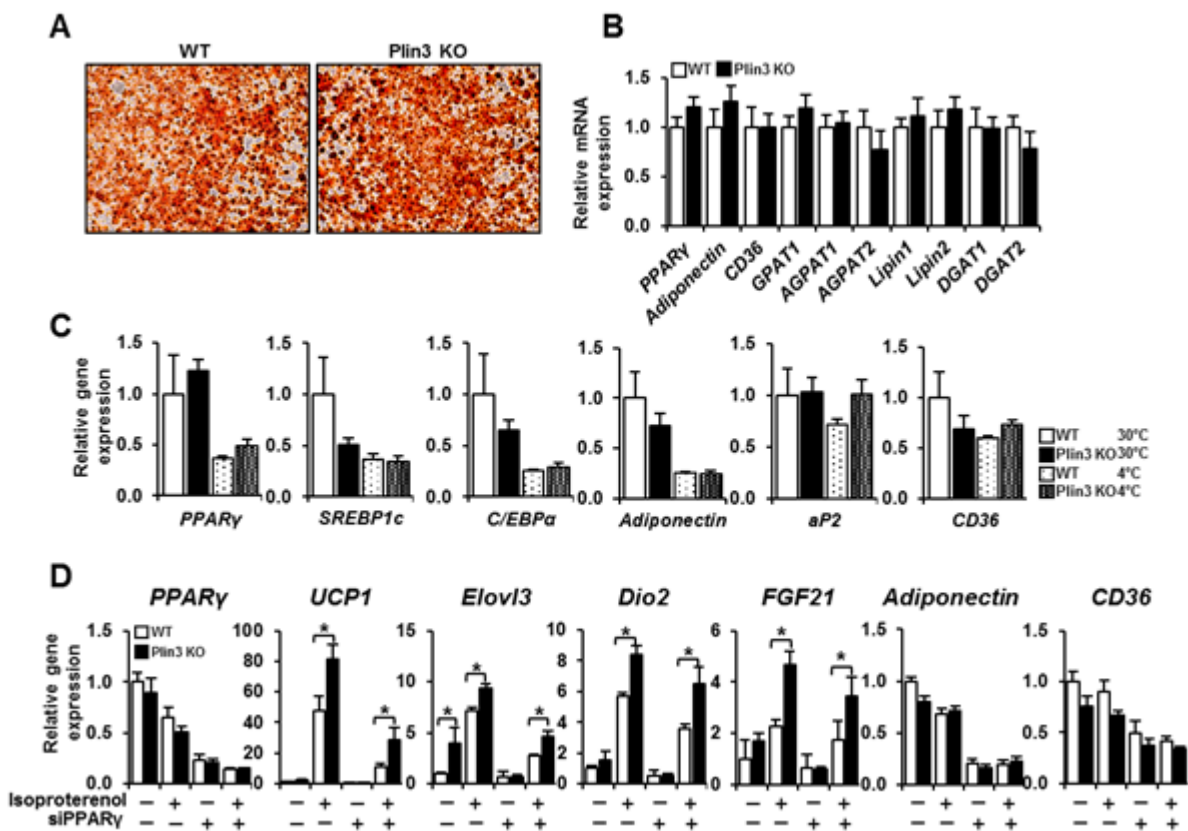

SUPPLEMENTARY DATA

**Supplementary Figure 10. Inactivation of PPAR $\alpha$  in *Plin3* KO mice on thermogenic capacity. (A)** Oxygen consumption rates of differentiated adipocytes from iWAT of WT or *Plin3* KO mice. Differentiated adipocytes were treated with PPAR $\alpha$  antagonist (GW-6471, 10  $\mu$ M) for 48 h. **(B)** Changes in rectal temperature by GW-6471 (10 mg/kg) injection for 20 min followed by 3 h cold exposure (n = 3-5 mice/group). PBS injected mice were used as control vehicle group. **(C)** RT-qPCR analysis of *PPAR $\alpha$* , *UCP1*, and *FGF21* gene expression in iWAT from WT and *Plin3* KO mice administered GW-6471 followed by 4°C exposure (n = 3-5 mice/group). Each mRNA level was normalized to cyclophilin mRNA, and mRNA expression levels are relative to WT vehicle. Data represent the mean  $\pm$  SEM. \**p* < 0.05, \*\**p* < 0.01 indicate significant differences between groups as determined by either two-tailed unpaired Student's *t* tests or two-way ANOVA versus control. #*p* < 0.05, ##*p* < 0.01 indicate significant differences between KO vehicle vs. WT + GW-6471 and/or *Plin3* KO + GW-6471 as determined by two-tailed unpaired Student's *t* tests.

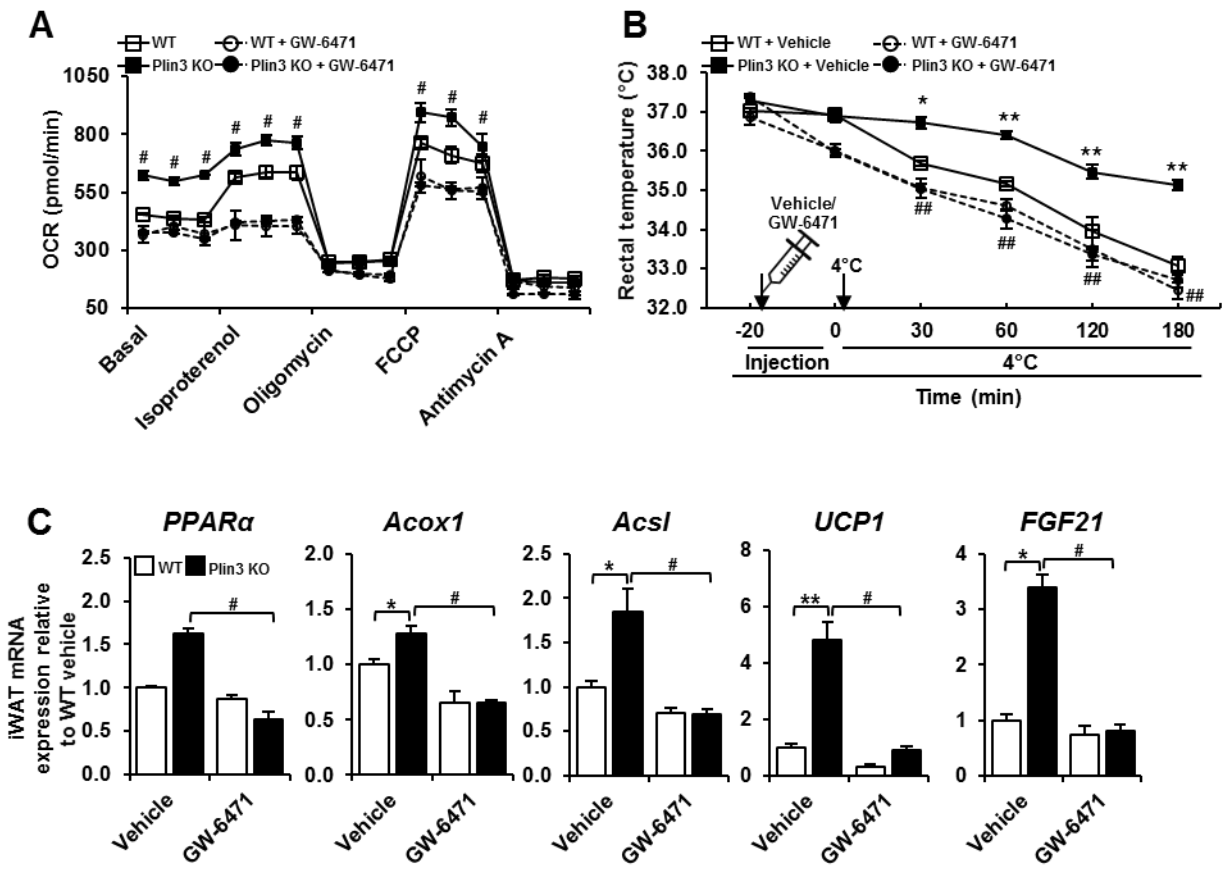

SUPPLEMENTARY DATA

**Supplementary Figure 11. Metabolic phenotypes of *Plin3* KO mice upon high fat diet (HFD).** WT and *Plin3* KO mice were fed HFD (n = 10-11) for 8-10 weeks from 8 weeks of age. **(A)** Body weights of WT and *Plin3* KO mice on high fat diet (n = 10–11 mice/group). **(B)** Tissue weights in WT and *Plin3* KO mice after 8 weeks of HFD (n = 10-11 mice/group). **(C)** Intraperitoneal glucose tolerance test (GTT). **(D)** Intraperitoneal insulin tolerance test (ITT). **(E)** *Ex vivo* iWAT lipolysis assay from HFD-fed mice for 8-10weeks (n = 6 mice/group). Data represent the mean ± SEM. \**p* < 0.05 indicates significant differences between groups as determined by two-tailed unpaired Student's *t* tests in comparison to control.

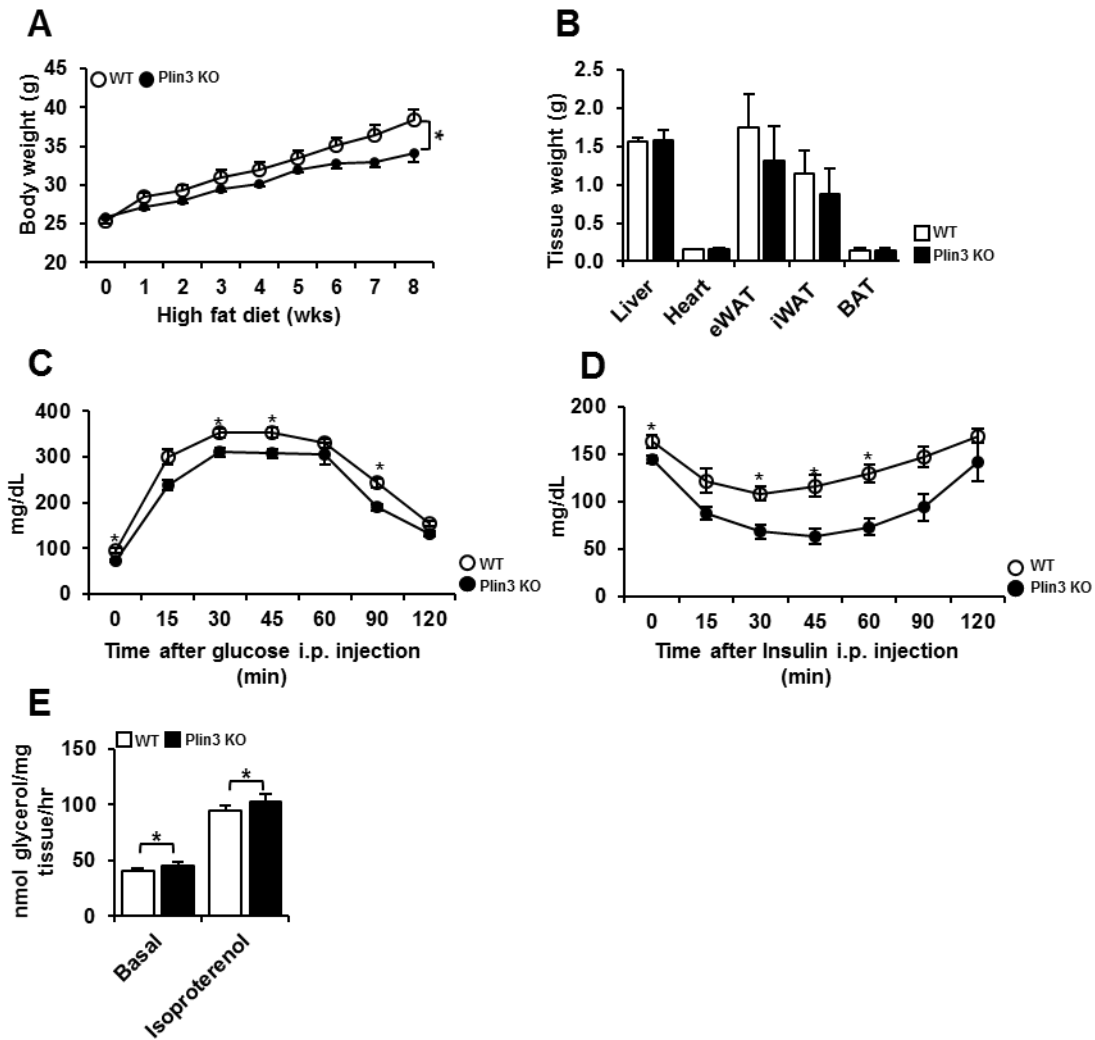

SUPPLEMENTARY DATA

**Supplementary Table 1. Sequence information of the RT-qPCR primers used in this study.**

| <i>Gene</i>                          | <i>5' sequence</i>            | <i>3' sequence</i>           |
|--------------------------------------|-------------------------------|------------------------------|
| <b>Mouse UCP1</b>                    | GGCCCTTGTAACAACAAA<br>A       | GGCAACAAGAGCTGACAGTA         |
| <b>Mouse Plin3</b>                   | CTGAGAAAGGCGTCAAGAC<br>C      | TTTCTTGAGCCCCAGACACT         |
| <b>Mouse PGC1<math>\alpha</math></b> | AAGGTCCCCAGGCAGTAGA<br>T      | GCTCTTTGCGGTATTCATCC         |
| <b>Mouse PGC1<math>\beta</math></b>  | CTCCAGGCAGGTTCAACCC           | GGGCCAGAAGTTCATCCC           |
| <b>Mouse Elovl3</b>                  | TGTTGGCCAGACCTACATGA          | ATCTGACTACGGCGTCATCC         |
| <b>Mouse Dio2</b>                    | TTCTCCAAGTGCCTCTTCCT<br>G     | CCCATCAGCGGTCTTCTCC          |
| <b>Mouse Cidea</b>                   | TCCTATGCTGCACAGATGAC<br>G     | TGCTCTTCTGTATCGCCCAGT        |
| <b>Mouse Cidec</b>                   | CTGGAGGAAGATGGCACAA<br>T      | GGGCCACATCGATCTTCTTA         |
| <b>Mouse CytC</b>                    | GGCTGCTGGATTCTCTTACA<br>CA    | CAAATACTCCATCAGGGTAT<br>CCT  |
| <b>Mouse ATPase</b>                  | CACCACCAAGAAGGGATCG<br>A      | GCAGGGTCAGTCAGGTCATC<br>A    |
| <b>Mouse Cox2</b>                    | TCTCCCCTCTCTACGCATTCT         | TCATTGGTGCCCTATGGTTT         |
| <b>Mouse Cox3</b>                    | CGGAAGTATTTTTCTTTGCA<br>GGAT  | CAGCAGCCTCCTAGATCATGT<br>G   |
| <b>Mouse Cox8b</b>                   | TGCGAAGTTCACAGTGGTTC          | ATGCTGCGGAGCTCTTTTTTA        |
| <b>Mouse Tfam</b>                    | CCACAGAACAGCTACCCAA<br>ATTT   | TCCACAGGGCTGCAATTTTC         |
| <b>Mouse Nrf1</b>                    | AAGAGACAGCAGACACGTT<br>TGC    | TCCCACTCGCGTCGTGTAC          |
| <b>Mouse PPAR<math>\alpha</math></b> | ATGCCAGTACTGCCGTTTTC          | GGCCTTGACCTTGTTTCATGT        |
| <b>Mouse CPT1<math>\alpha</math></b> | CATCACCCCAACCCATATTC          | CGTGTTGGATGGTGTCTGTC         |
| <b>Mouse CPT1<math>\beta</math></b>  | TGTCATGGCAACAGTTGGTT          | GACTCCGGTGGAGAAGATGA         |
| <b>Mouse CPT2</b>                    | CTATCTGCCAGCTTCCATC           | ATAGAGCTCAGGCAGGGTGA         |
| <b>Mouse Acs1</b>                    | GTCCTGGGCACAGAAGAGA<br>G      | GTCAGAAGGCCGTTGTCAAT         |
| <b>Mouse Acox1</b>                   | CAGGAAGAGCAAGGAAGTG<br>G      | CCTTTCTGGCTGATCCCATA         |
| <b>Mouse MCAD</b>                    | AGGTTTCAAGATCGCAATGG          | CTCCTTGGTGCTCCACTAGC         |
| <b>Mouse LCAD</b>                    | TGCGAAGTTCACAGTGGTTC          | TCAGGGATGTGCAACTTCA          |
| <b>Mouse FGF21</b>                   | AGCATACCCCATCCCTGACT          | TCCTCCCTGATCTCCAGGTG         |
| <b>Mouse PPAR<math>\gamma</math></b> | TTGCTGSSCGTGAAGCCCAT<br>CGAGG | GTCTTGATAGATCTCCTGGAGC<br>AG |
| <b>Mouse adiponectin</b>             | GGCAGGAAAGGAGAACCTG<br>G      | AGCCTTGTCCTTCTTGAAGA<br>G    |

SUPPLEMENTARY DATA

|                                       |                                             |                                               |
|---------------------------------------|---------------------------------------------|-----------------------------------------------|
| <b>Mouse CD36</b>                     | GAGCAACTGGTGGATGGTTT                        | GCAGAATCAAGGGAGAGCAC                          |
| <b>Mouse GPAT1</b>                    | ACAGTTGGCACAATAGACG<br>TTT                  | CCTTCCATTTTCAGTGTTCAG<br>A                    |
| <b>Mouse AGPAT1</b>                   | TAAGATGGCCTTCTACAACG<br>GC                  | CCATACAGGTATTTGACGTGG<br>AG                   |
| <b>Mouse AGPAT2</b>                   | CTTCAAGTACGTGTATGGCC<br>TT                  | CTGTGAACATTAGCTCACGCT                         |
| <b>Mouse Lipin1</b>                   | CTCCGCTCCCGAGAGAAAG<br>GAAGTGGCGGCTCTCTATTT | TCATGTGCAAATCCACGGACT<br>AGAGGGTTACATCAGGCAAG |
| <b>Mouse Lipin2</b>                   | C                                           | T                                             |
| <b>Mouse DGAT1</b>                    | CTGATCCTGAGTAATGCAAG<br>GTT                 | TGGATGCAATAATCACGCATG<br>G                    |
| <b>Mouse DGAT2</b>                    | GCGCTACTTCCGAGACTACT<br>T                   | GGGCCTTATGCCAGGAAACT                          |
| <b>Mouse SREBP1c</b>                  | GGAGCCATGGATTGCACATT<br>CGTGCAGAACTCCTGTGAT | CAGGAAGGCTTCCAGAGAGG<br>GTCCACCTATGCTGGAGAAG  |
| <b>Mouse CD137</b>                    | AAC                                         | G                                             |
| <b>Mouse Tbx1</b>                     | GGCAGGCAGACGAATGTTC<br>CCTGTAACCCCGAACTCC   | TTGTCATCTACGGGCACAAA<br>G                     |
| <b>Mouse Ear2</b>                     | A                                           | CAGATGAGCAAAGGTGCAAA                          |
| <b>Mouse Tmem26</b>                   | ACCCTGTCATCCCACAGAG                         | TGTTTGGTGGAGTCCTAAGG<br>TC                    |
| <b>Mouse Slc27a1</b>                  | CTGGGACTTCCGTGGACCT                         | TCTTGCAGACGATACGCAGA<br>A                     |
| <b>Mouse C/EBP<math>\alpha</math></b> | ATCGACTTCAGCCCCTACCT<br>AAGAAGTGGGAGTGGGCTT | CTCTGGGATGGATCGATTGT<br>GCTCTTCACCTTCCCTGTCGT |
| <b>Mouse aP2</b>                      | T                                           |                                               |
| <b>Mouse 18s rRNA</b>                 | TCATAAGCTTGCGTTGATTA                        | TAGTCAAGTTCGACCGTCTT                          |
| <b>Mouse 16s rRNA</b>                 | ACATCCCAATGGTGTAGAAG                        | AAGTTGAGAGCGCTTATTTG                          |
| <b>Mouse cyclophilin</b>              | CAGACGCCACTGTCGCTTT                         | TGTCTTTGGAACCTTTGTCTG                         |
